# Supplementary material for: Wolbachia enhances insect‐specific flavivirus infection in Aedes aegypti mosquitoes
Source: PubMed Central journal article supplement (PMC6010864; doi:10.1002/ece3.4066), 2018-05-08

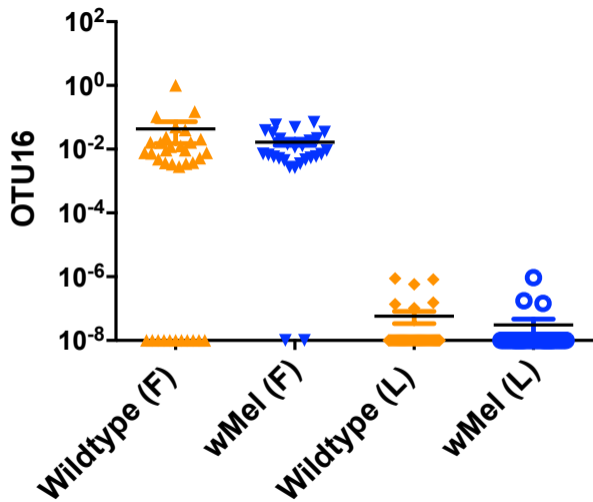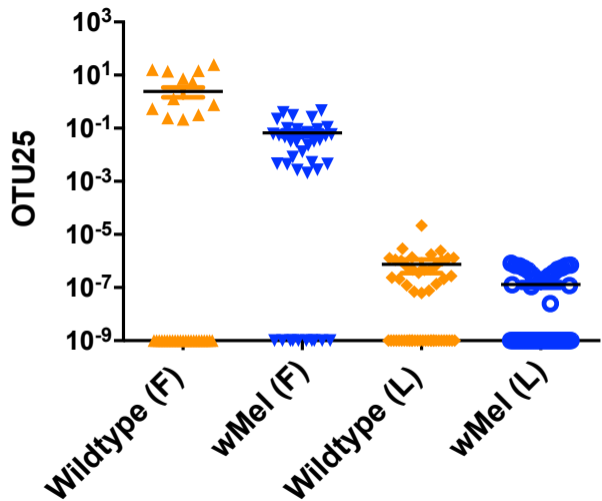

Supplement: ECE3-8-5441-s001.pdf [file ECE3-8-5441-s001.pdf]
